# Supplementary material
Source: publisher figshare collection journal article supplement (https://frontiersin.figshare.com/ndownloader/files/21913269)
Supplement: Supplementary file 1 [file 21913269]

**Supplementary materials for**

**Passive and active removal of marine microplastics by a mushroom coral (*Danafungia scruposa*)**

**Elena Corona<sup>1</sup>, Cecilia Martin<sup>2</sup>, Ramona Marasco<sup>3</sup>, Carlos M. Duarte<sup>2</sup>**

<sup>1</sup> Department of Environmental and Earth Sciences (DISAT), University of Milano – Bicocca,  
20126 Milan, Italy.

<sup>2</sup> Red Sea Research Center (RSRC) and Computational Bioscience Research Center (CBRC), King  
Abdullah University of Science and Technology (KAUST), Thuwal 23955, Saudi Arabia.

<sup>3</sup> Red Sea Research Center (RSRC), King Abdullah University of Science and Technology  
(KAUST), Thuwal 23955, Saudi Arabia.

\*Correspondence to Elena Corona: [e.corona2@campus.numib.it](mailto:e.corona2@campus.numib.it)

## Figures

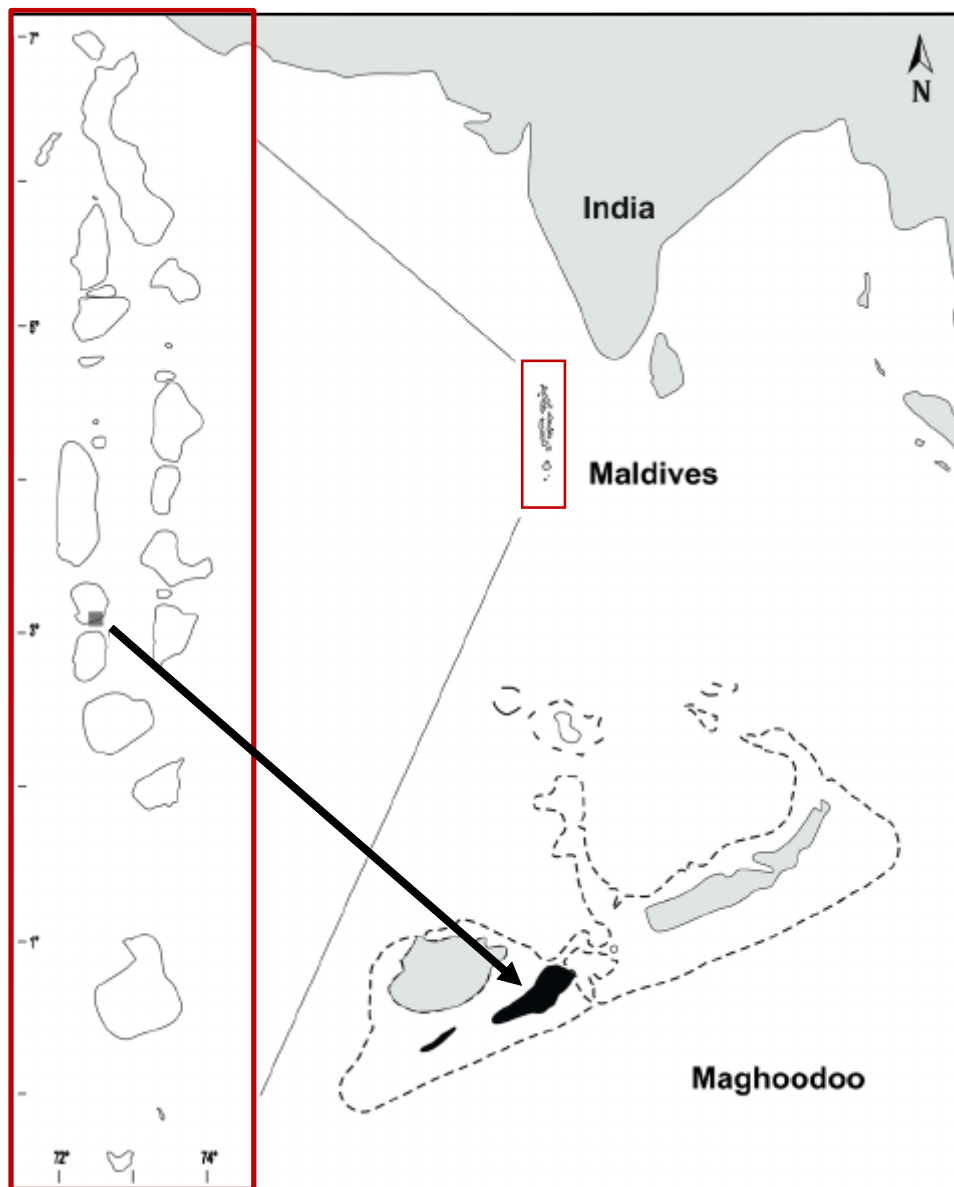

**Figure S1: Sampling site.** The inhabited island of Magoodhoo, Faafu Atoll, Republic of Maldives (N 3° 05' 24.3'' E 72° 58' 04.5'').

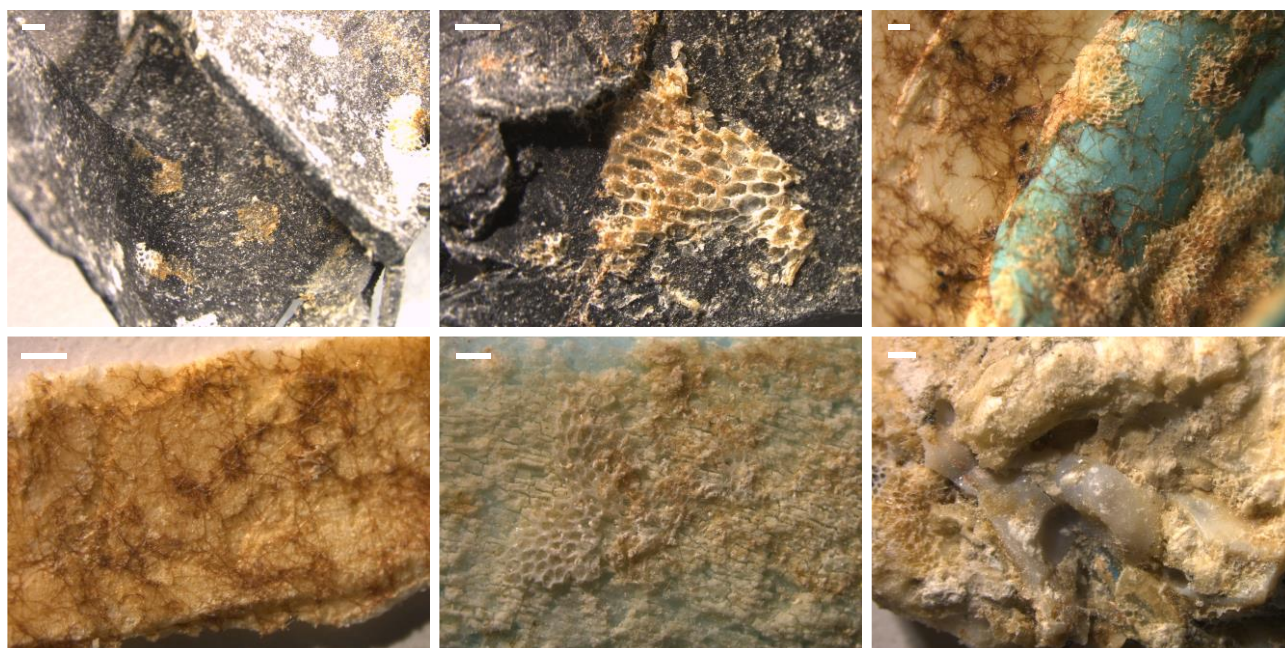

**Figure S2 Stereomicroscope imaging of plastic collected from the marine environment.** Bars represent a 1 mm scale.

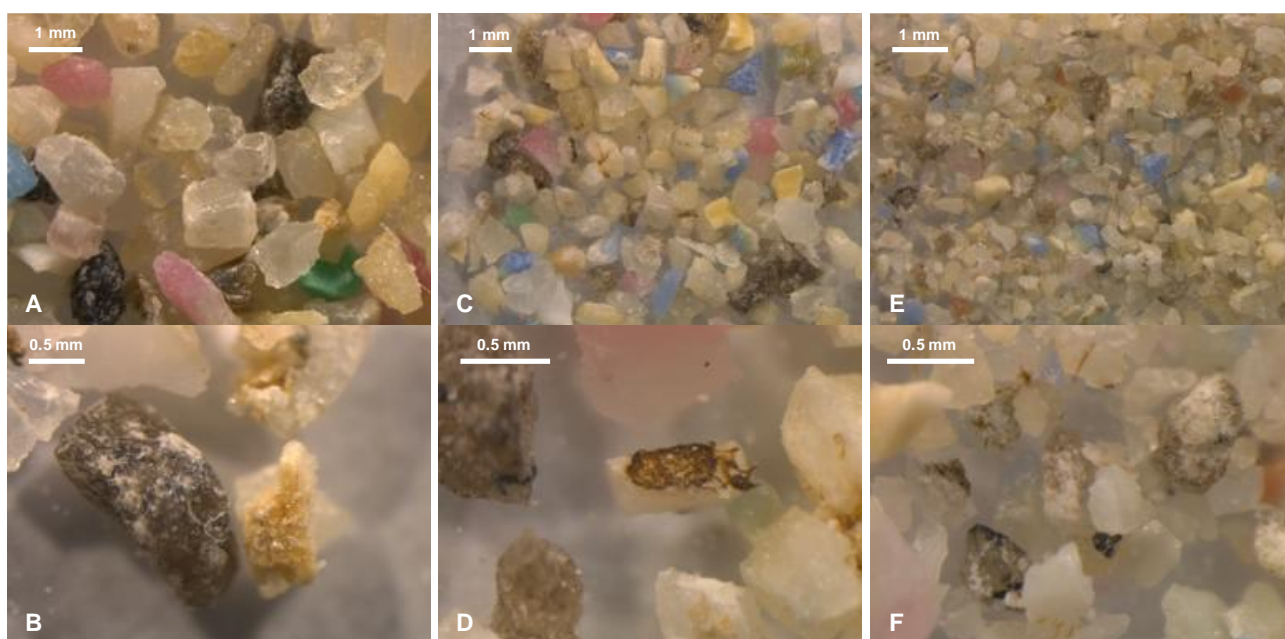

**Figure S3 Stereomicroscope imaging of microplastics obtained from fragmentation of plastics collected from the marine environment.** Imaging of microplastics from three size classes: 800-1000 µm (A, B), 500 – 800 µm (C, D) and 200 – 500 µm (E, F).

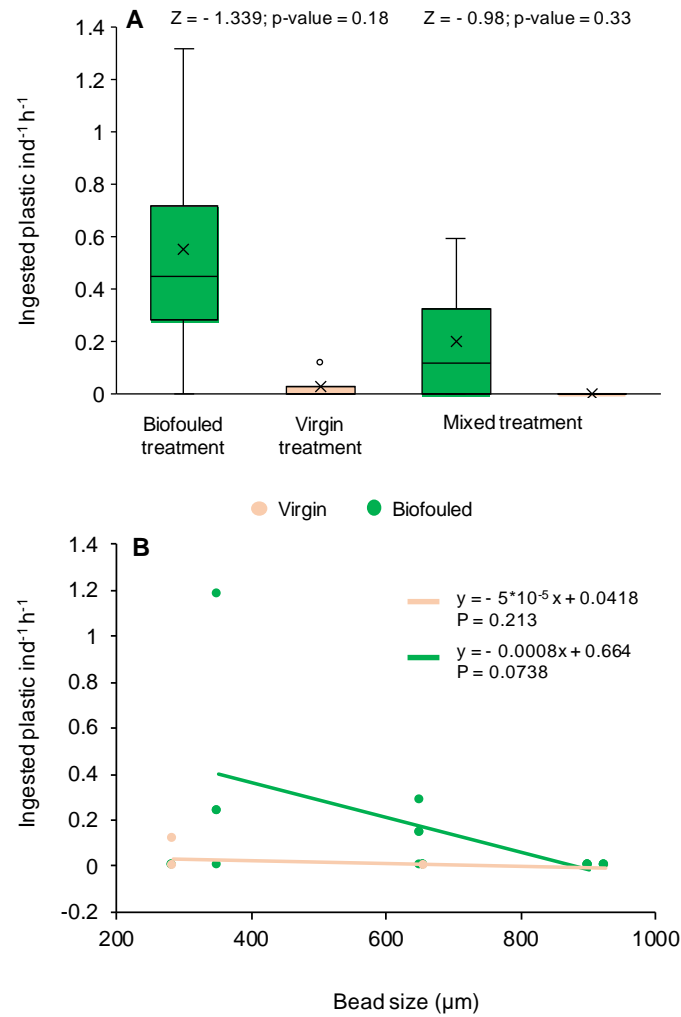

**Figure S4 Plastic removal by ingestion and distribution of ingested plastic in size classes (corrected values).** **A)** Ingested plastic (number of microplastics individual<sup>-1</sup> hour<sup>-1</sup>, corrected values following recovery test) in corals exposed to three treatments: corals treated with biofouled plastic only (“Biofouled”, in green, N=4), with virgin plastic only (“Virgin”, in pink, N=4) and biofouled plastic (in green) and virgin plastic (in pink) mixed (“Mixed”, N=6). All estimates have been compared with Wilcoxon tests for which the p-value and Z value are reported in the figures. **B)** Distribution of ingested plastic (N microplastics individual<sup>-1</sup> hour<sup>-1</sup>, corrected values following recovery test) in size classes in the Virgin treatment (pink) and in the Biofouled treatment (green). Size classes are reported as the mean value of the size class bin. Lines represent the linear fit of each set of data of the corresponding colour. Equations and p-values of each linear model are reported in figure.

## Tables

**Table S1 Size classes, mass and number of plastics used for the Plastic and Plastic + *Artemia salina* treatments (first experiment).** The first column reports the 3 size classes of plastic to which each of 14 corals were exposed in the first experiment, while the second and third column reports the weight and number of plastic used for each size class.

| <b>Plastic (x7) and<br/>Plastic + <i>Artemia salina</i> (x7) treatments</b> |                     |                |
|-----------------------------------------------------------------------------|---------------------|----------------|
| Size class (µm)                                                             | Weight (g)          | N              |
| 212-355                                                                     | $0.012 \pm 0.00005$ | $997 \pm 5$    |
| 600-710                                                                     | $0.147 \pm 0.00003$ | $1000 \pm 0.2$ |
| 850-1000                                                                    | $0.414 \pm 0.00006$ | $1000 \pm 0.1$ |

**Table S2 Size classes, mass and number of plastics used for the Virgin, Biofouled and Mixed treatments (second experiment).** The column “Size class” reports the 3 size classes of plastic to which each of 4 corals were exposed in the Virgin treatment, each of 4 corals in the Biofouled treatment and each of 6 corals in the Mixed treatment. The second and third column reports the mean weight and number ( $\pm$ SE) of plastic used for each size class and treatment.

| <b>Virgin treatment</b>  |                     |                | <b>Biofouled treatment</b> |                     |               |
|--------------------------|---------------------|----------------|----------------------------|---------------------|---------------|
| Size class<br>( $\mu$ m) | Weight (g)          | Number         | Size class<br>( $\mu$ m)   | Weight (g)          | Number        |
| 212-355                  | 0.012 $\pm$ 0.0001  | 997 $\pm$ 6    | 200-500                    | 0.023 $\pm$ 0.0001  | 927 $\pm$ 16  |
| 600-710                  | 0.147 $\pm$ 0.0002  | 1000 $\pm$ 0.6 | 500-800                    | 0.144 $\pm$ 0.0001  | 1040 $\pm$ 40 |
| 800-1000                 | 0.414 $\pm$ 0.0002  | 1000 $\pm$ 0.2 | 800-1000                   | 0.382 $\pm$ 0.0001  | 1039 $\pm$ 16 |
| <b>Mixed treatment</b>   |                     |                |                            |                     |               |
| Size class<br>( $\mu$ m) | Weight (g)          | N              | Size class<br>( $\mu$ m)   | Weight (g)          | N             |
| 212-355                  | 0.006 $\pm$ 0.00007 | 480 $\pm$ 11   | 200-500                    | 0.011 $\pm$ 0.00003 | 467 $\pm$ 7   |
| 600-710                  | 0.073 $\pm$ 0.00004 | 500 $\pm$ 0.2  | 500-800                    | 0.072 $\pm$ 0.00005 | 520 $\pm$ 16  |
| 800-1000                 | 0.207 $\pm$ 0.00003 | 500 $\pm$ 0.1  | 800-1000                   | 0.191 $\pm$ 0.00005 | 519 $\pm$ 6   |

**Table S3.** Yields (ng/g and ng/ $\mu$ L) and quality (A260/280 and A260/230) of total DNA extracted from  $0.25 \pm 0.01$  g of three classes of microplastic obtained from natural plastic fragments (Figure S2).

| Total DNA                             | Particle size ( $\mu$ m) |                 |                 |
|---------------------------------------|--------------------------|-----------------|-----------------|
|                                       | 200-500                  | 500-800         | 800-1000        |
| Number of plastic fragments in 0.25 g | $10300 \pm 438$          | $1727 \pm 124$  | $650 \pm 40$    |
| ng/g                                  | $134.9 \pm 11.4$         | $73 \pm 8.3$    | $48.4 \pm 1.4$  |
| ng/ $\mu$ L                           | $0.31 \pm 0.05$          | $0.18 \pm 0.01$ | $0.12 \pm 0.01$ |
| A260/280                              | $1.49 \pm 0.03$          | $1.54 \pm 0.08$ | $1.51 \pm 0.08$ |
| A260/230                              | $0.45 \pm 0.04$          | $0.41 \pm 0.02$ | $0.41 \pm 0.04$ |

**Table S4 Descriptive statistics of ingested plastic in the two experiments.** Mean, Median, first and third quartile values ( $Q_1$  and  $Q_3$ ) and interquartile range ( $IQR = Q_3 - Q_1$ ) of number of plastic pieces ingested individual<sup>-1</sup> h<sup>-1</sup> in each treatment of the two experiments and for each plastic type of the Mixed treatment of the second experiment.

| <b>First experiment</b>              |       |        |       |       |       |
|--------------------------------------|-------|--------|-------|-------|-------|
|                                      | Mean  | Median | $Q_1$ | $Q_3$ | IQR   |
| Plastic + <i>Artemia</i>             | 0.107 | 0.125  | 0     | 0.188 | 0.188 |
| Plastic                              | 0.125 | 0      | 0     | 0.188 | 0.188 |
| <b>Second experiment</b>             |       |        |       |       |       |
|                                      | Mean  | Median | $Q_1$ | $Q_3$ | IQR   |
| Biofouled treatment:                 |       |        |       |       |       |
| - Uncorrected values                 | 0.344 | 0.313  | 0.188 | 0.469 | 0.281 |
| - Corrected values                   | 0.553 | 0.449  | 0.283 | 0.719 | 0.436 |
| Virgin treatment                     | 0.031 | 0      | 0     | 0.031 | 0.031 |
| Mixed treatment - biofouled plastic: |       |        |       |       |       |
| - Uncorrected values                 | 0.125 | 0.063  | 0     | 0.218 | 0.219 |
| - Corrected values                   | 0.198 | 0.117  | 0     | 0.328 | 0.328 |
| Mixed treatment - virgin plastic     | 0     | 0      | 0     | 0     | 0     |

**Table S5 Result of ANCOVA tests.** Results of the ANCOVA tests between the Plastic and Plastic + *Artemia salina* treatments and between the Biofouled and Virgin treatments for both ingested and adhered plastic. For each ANCOVA test, we report the independent variable tested (Term), the estimates of the intercept and of the slopes (Est.), the standard error, T and the p-values of the model.

| Comparison (ANCOVA test) between Plastic and Plastic + <i>Artemia salina</i> treatments |            |           |       |          |
|-----------------------------------------------------------------------------------------|------------|-----------|-------|----------|
| INGESTION                                                                               |            |           |       |          |
| Term                                                                                    | Est.       | Std.error | T     | Prob> t  |
| Intercept                                                                               | 0.1451944  | 0.031216  | 4.65  | <0.0001* |
| Treatment                                                                               | -0.002976  | 0.012271  | -0.24 | 0.8097   |
| size                                                                                    | -0.000172  | 4.632e-5  | -3.71 | 0.0007*  |
| Treatment*size                                                                          | -1.498e-6  | 4.632e-5  | -0.03 | 0.9744   |
| ADHESION                                                                                |            |           |       |          |
| Term                                                                                    | Est.       | Std.error | T     | Prob> t  |
| Intercept                                                                               | 2.3234777  | 0.492276  | 4.72  | <0.0001* |
| Treatment                                                                               | 0.077381   | 0.193508  | 0.40  | 0.6915   |
| size                                                                                    | -0.001146  | 0.00073   | -1.57 | 0.1248   |
| Treatment*size                                                                          | -6.443e-5  | 0.00073   | -0.09 | 0.9302   |
| Comparison (ANCOVA test) between Virgin and Biofouled treatments                        |            |           |       |          |
| INGESTION                                                                               |            |           |       |          |
| Term                                                                                    | Est.       | Std.error | T     | Prob> t  |
| Intercept                                                                               | 0.2110343  | 0.080504  | 2.62  | 0.0185*  |
| Treatment                                                                               | 0.0546895  | 0.03007   | 1.82  | 0.0877   |
| size                                                                                    | -0.000233  | 0.000123  | -1.89 | 0.0767   |
| Treatment*size                                                                          | -0.000162  | 0.000123  | -1.31 | 0.2087   |
| ADHESION                                                                                |            |           |       |          |
| Term                                                                                    | Est.       | Std.error | T     | Prob> t  |
| Intercept                                                                               | 2.4527063  | 1.53787   | 1.59  | 0.1264   |
| Treatment                                                                               | -0.0013965 | 0.002286  | 0.61  | 0.5481   |
| size                                                                                    | -0.499126  | 0.554326  | -0.90 | 0.3786   |
| Treatment*size                                                                          | -0.003735  | 0.002286  | -1.63 | 0.1179   |

**Supplementary Data 1** (external file). Abundance of plastic found ingested, adhered to the coral surface and left in the bag at the end of two experiments for each coral replicate and size class of plastic.
